# Supplementary material for: Trastuzumab mediates antibody-dependent cell-mediated cytotoxicity and phagocytosis to the same extent in both adjuvant and metastatic HER2/neu breast cancer patients
Source: PubMed Central journal article supplement (PMC4029549; doi:10.1186/1479-5876-11-307), 2013-12-12

**A**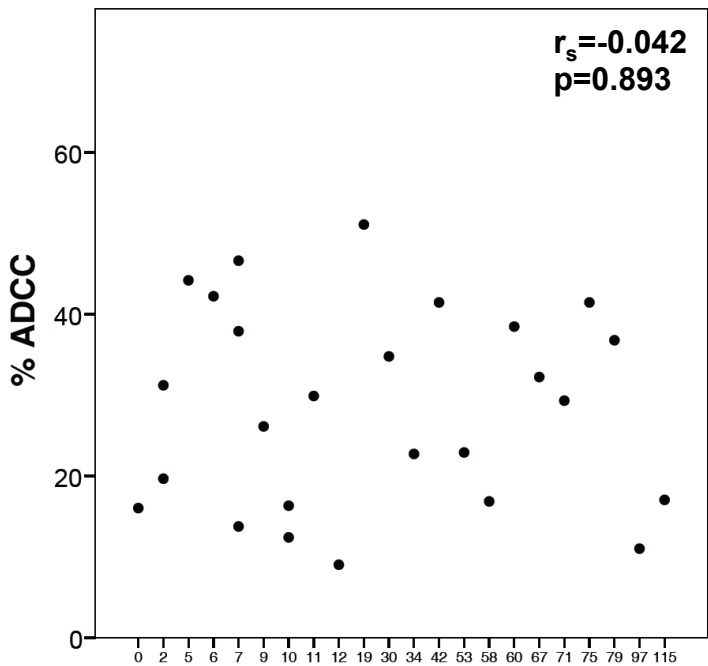**B**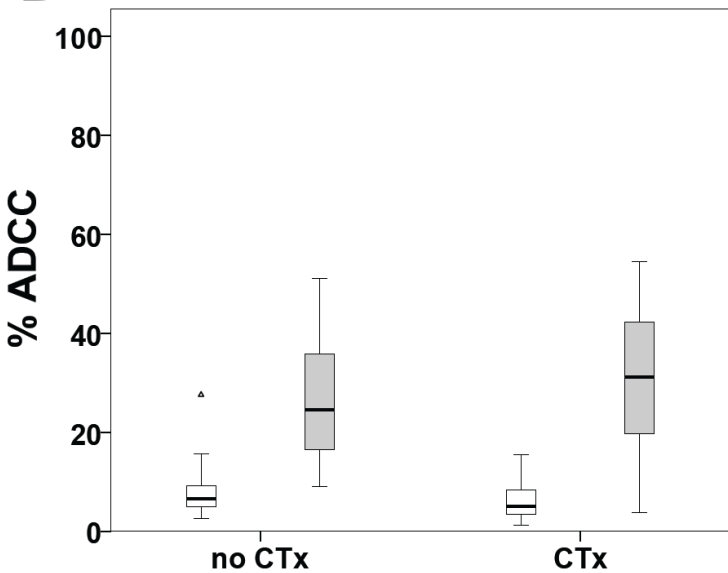

Supplement: 1479-5876-11-307-S2.pdf [file 1479-5876-11-307-S2.pdf]
